# Supplementary material
Source: Royal Society of Chemistry journal article supplement (doi:10.1039/d6cp00916f)

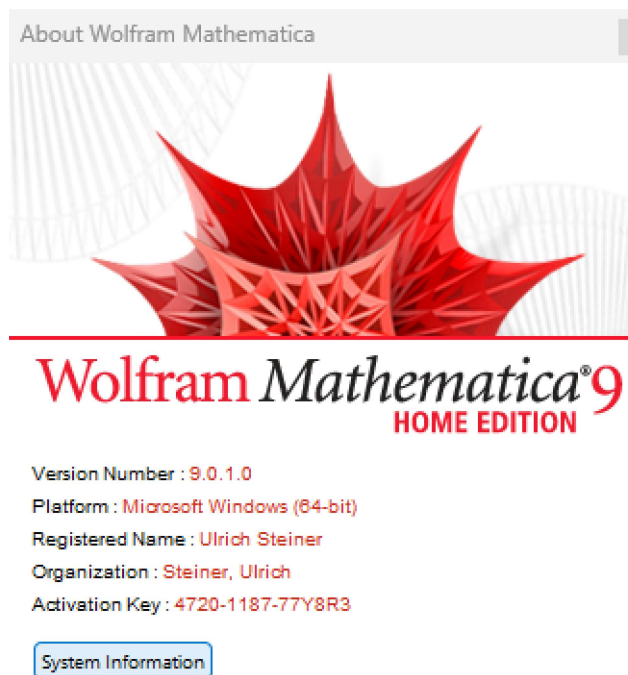

© Copyright 1988-2013 Wolfram Research, Inc. Protected by copyright law and international treaties. Unauthorized reproduction or distribution subject to severe civil and criminal penalties. *Mathematica* is a registered trademark of Wolfram Research. This About Box is a *Mathematica* notebook.

[License Agreement](#) | [Privacy Policy](#) | [Credits](#)

## *Mathematica* Notebook for Calculating the Spin- and Reaction Dynamics of Rigidly Linked Radical Pairs

**basic version** developed by

Ulrich E. Steiner, University of Konstanz, Konstanz and  
Nikita N. Lukzen, International Tomography Institute,  
Novosibirsk.

**basic theory** described in

Lukzen NN, Klein JH, Lambert C, Steiner UE. *Z Physik Chem N F.*  
2017;231(2):197-223.

**implementation of relaxation** according to Nakashima-Zwanzig theory,  
following:

P. Fay, L. P. Lindoy and D. E. Manolopoulos, *J. Chem. Phys.*, 2019, 151,  
154117.

**current version**, extended for reversibly coupled RP to a  
precursor S1 state  
by Ulrich E. Steiner

## Definition of Operators

```
=====
=====
```

```

U2 = {{1, 0}, {0, 1}};
U3 = {{1, 0, 0}, {0, 1, 0}, {0, 0, 1}};
U8 = KroneckerProduct[U2, U2, U2];
U12 = KroneckerProduct[U2, U2, U3];
U15 = IdentityMatrix[15];
sx = 1 / 2 * {{0, 1}, {1, 0}};
sy = 1 / 2 * {{0, -I}, {I, 0}};
sz = 1 / 2 * {{1, 0}, {0, -1}};
Ix = 1 / Sqrt[2] * {{0, 1, 0}, {1, 0, 1}, {0, 1, 0}};
Iy = I / Sqrt[2] * {{0, -1, 0}, {1, 0, -1}, {0, 1, 0}};
Iz = {{1, 0, 0}, {0, 0, 0}, {0, 0, -1}};
S1x = KroneckerProduct[sx, U2, U3];
S1y = KroneckerProduct[sy, U2, U3];
S1z = KroneckerProduct[sz, U2, U3];
S2x = KroneckerProduct[U2, sx, U3];
S2y = KroneckerProduct[U2, sy, U3];
S2z = KroneckerProduct[U2, sz, U3];
INx = KroneckerProduct[U2, U2, Ix];
INy = KroneckerProduct[U2, U2, Iy];
INz = KroneckerProduct[U2, U2, Iz];
S1p = S1x + I * S1y;
S1m = S1x - I * S1y;
INp = INx + I * INy;
INm = INx - I * INy;
S1 = {S1x, S1y, S1z};
IN = {INx, INy, INz};
QS = 1 / 4 * U12 - S1x.S2x - S1y.S2y - S1z.S2z;
QT = U12 - QS;
psiTp = {1, 0, 0, 0};
psiTm = {0, 0, 0, 1};
psiT0 = {0, 1, 1, 0} / Sqrt[2];
psiS = {0, 1, -1, 0} / Sqrt[2];
psiSTpcoh = (psiS + psiTp) / Sqrt[2];
PSTpcoh = Outer[Times, psiSTpcoh, psiSTpcoh*];
QSTpcoh = KroneckerProduct[PSTpcoh, U3];
PT0 = Outer[Times, psiT0, psiT0*];
PTp = Outer[Times, psiTp, psiTp*];
PTm = Outer[Times, psiTm, psiTm*];
qS = Outer[Times, psiS, psiS*];
QT0 = KroneckerProduct[PT0, U3];
QTp = KroneckerProduct[PTp, U3];
QTm = KroneckerProduct[PTm, U3];
UN1 = {{1, 0, 0}, {0, 0, 0}, {0, 0, 0}};
UN0 = {{0, 0, 0}, {0, 1, 0}, {0, 0, 0}};
UNm1 = {{0, 0, 0}, {0, 0, 0}, {0, 0, 1}};
QTpm = QT - QT0;
de[i_, j_] := If[i == j, 1.0, 0];

```

**(\*Operators in {15,15}\*)**

```

QS1 = ConstantArray[0, {15, 15}];
QS1[[13, 13]] = 1; QS1[[14, 14]] = 1; QS1[[15, 15]] = 1;
QS1sup = KroneckerProduct[QS1, QS1T];
QS15 = ArrayPad[QS, {{0, 3}, {0, 3}}, 0];
QT15 = ArrayPad[QT, {{0, 3}, {0, 3}}, 0];
U1512 = IdentityMatrix[15] - QS1;
Pex = {{0, 0, 0}, {0, 0, 0}, {0, 0, 0},
        {0, 0, 0}, {0, 0, 0}, {0, 0, 0}, {0, 0, 0}, {0, 0, 0}, {0, 0, 0}, {0, 0, 0},
        {0, 0, 0}, {0, 0, 0}, {0, 0, 0}, {1, 0, 0}, {0, 1, 0}, {0, 0, 1}};
Pin = {{0, 0, 0}, {0, 0, 0}, {0, 0, 0}, {0, 0, 0}, {0, 0, 0},
        {0, 0, 0}, {1, 0, 0}, {0, 1, 0}, {0, 0, 1}, {0, 0, 0},
        {0, 0, 0}, {0, 0, 0}, {0, 0, 0}, {0, 0, 0}, {0, 0, 0}};
Qex = {{0, 0, 0}, {0, 0, 0}, {0, 0, 0}, {0, 0, 0}, {0, 0, 0},
        {0, 0, 0}, {1, 0, 0}, {0, 1, 0}, {0, 0, 1}, {0, 0, 0},
        {0, 0, 0}, {0, 0, 0}, {0, 0, 0}, {0, 0, 0}, {0, 0, 0}};
Qin = {{0, 0, 0}, {0, 0, 0}, {0, 0, 0}, {0, 0, 0}, {0, 0, 0},
        {0, 0, 0}, {0, 0, 0}, {0, 0, 0}, {0, 0, 0}, {0, 0, 0},
        {0, 0, 0}, {0, 0, 0}, {1, 0, 0}, {0, 1, 0}, {0, 0, 1}};
linNr144[a_, b_, c_, d_] := d + 3 * (c - 1) + 3 * 4 * (b - 1) + 3 * 4 * 3 * (a - 1)
linNr225[a_, b_, c_, d_] := d + 3 * (c - 1) + 5 * 3 * (b - 1) + 3 * 5 * 3 * (a - 1)
LsupRM4 = ConstantArray[0, {4, 3, 4, 3, 4, 3, 4, 3}];
LsupRM5 = ConstantArray[0, {5, 3, 4, 3, 5, 3, 4, 3}];
LsupR225 = ConstantArray[0, {225, 225}];

(*===== Verschwinden von S1 durch CS*)
QSsup = KroneckerProduct[QS15, QS15T];
(*===== S1 Rückbildung aus 1CSS*)
S1ausrCS =
  KroneckerProduct[T15.Qin.QexT.T15m, (T15.Qex.QinT.T15m)T];
(*===== Bildung von 1CSS durch CS aus S1*)
SCSSsausCS =
  KroneckerProduct[T15.Pin.PexT, (Pex.PinT.T15m)T];

(*SCSSperkrCR=KroneckerProduct[QS15, QS15T];*)
SCSSperkrCR = 1 / 2
  (KroneckerProduct[QS15, U15] + KroneckerProduct[U15, QS15T]);

(*jetzt mit Haberkornversion
von Abreaktion per krCS nach S1
ursprünglich:
SCSSperkrCR=KroneckerProduct[QS15, QS15T];
=====
Verschwinden von 1CSS durch Rückbildung von S1*)
sq2 = 1 / Sqrt[2];
T15m = {{1, 0, 0, 0, 0, 0, 0, 0, 0, 0, 0, 0, 0, 0, 0},
        {0, 1, 0, 0, 0, 0, 0, 0, 0, 0, 0, 0, 0, 0, 0}, {0, 0, 1, 0, 0, 0, 0, 0, 0, 0, 0, 0, 0, 0, 0},
        {0, 0, 0, 0, 0, 0, 0, 0}, sq2 {0, 0, 0, 1, 0, 0, 1, 0, 0, 0, 0, 0, 0, 0, 0},
        sq2 {0, 0, 0, 0, 1, 0, 0, 1, 0, 0, 0, 0, 0, 0, 0},
        sq2 {0, 0, 0, 0, 0, 1, 0, 0, 1, 0, 0, 0, 0, 0, 0}};

```

```

sq2 {0, 0, 0, -1, 0, 0, 1, 0, 0, 0, 0, 0, 0, 0, 0},
sq2 {0, 0, 0, 0, -1, 0, 0, 1, 0, 0, 0, 0, 0, 0, 0},
sq2 {0, 0, 0, 0, 0, -1, 0, 0, 1, 0, 0, 0, 0, 0, 0},
{0, 0, 0, 0, 0, 0, 0, 0, 0, 0, 1, 0, 0, 0, 0}, {0, 0, 0, 0, 0, 0, 0, 0, 0, 0, 0, 0, 0, 0, 0},
{0, 0, 0, 0, 0, 0, 0, 0, 0, 0, 0, 0, 0, 0, 0}, {0, 0, 0, 0, 0, 0, 0, 0, 0, 0, 0, 0, 0, 1, 0, 0},
{0, 0, 0, 0, 0, 0, 0, 0, 0, 0, 0, 0, 0, 0, 0, 0}, {0, 0, 0, 0, 0, 0, 0, 0, 0, 0, 0, 0, 0, 0, 0, 0},
{0, 0, 0, 0, 0, 0, 0, 0, 0, 0, 0, 0, 0, 0, 0, 0}, {0, 0, 0, 0, 0, 0, 0, 0, 0, 0, 0, 0, 0, 0, 0, 1}};
T15 = Inverse[T15m];

```

```

=====
=====

```

## Parameters

```

ΔA = 15;
DAR = (ΔA * ΔA) * 0.0176^2;
GG1 = gddg = 0; (*g-tensor anisotropie of radical 1*)
GG2 = 0; (*g-tensor anisotropie of radical 2*)
a = 10 * 0.0176;
J = 5 * 0.176;
kdeph = 0.1;
Tlong = Infinity; (*wenn ks = 0.00125 Tlong = inf völlig äquivalent!*)
τ = 0.6;
(*hier folgt alternativ die äquivalente Rechnung mit DARJ*)
DARJ = 0 * 5.0;
τJ = 0.055;
4 * DARJ * τJ;
ks = 0.001;
kt = 0.02;
kf = 0.25;
kCS = 1.0;
krCS = 0.025;

SETS1 = {{"kCS", "krCS", "kf", "ks", "kt", "kdeph",
  "Tlong", "τ", "2J/0.176", "ΔA, G", "DAR", "a,G"},
  {kCS, krCS, kf, ks, kt, kdeph, Tlong, τ, 2J/0.176, ΔA, DAR, a/0.0176}};
SETS1 // TableForm

```

| kCS | krCS  | kf   | ks    | kt   | kdeph | Tlong | τ   | 2J/0.176 | ΔA, G |
|-----|-------|------|-------|------|-------|-------|-----|----------|-------|
| 1.  | 0.025 | 0.25 | 0.001 | 0.02 | 0.1   | ∞     | 0.6 | 10.      | 15    |

```

kf * krCS / (kf + kCS)
0.005

```

## Magnetic Field Values in mT

```

FeldSel = {0, 2, 5, 7, 9, 10, 11, 12, 13, 15, 17, 20, 25, 30, 40, 50, 60, 80, 100, 200};
nFull = nSel = Dimensions[FeldSel][[1]]
20

```

## Parameters to be varied during run

```

ksA = {0.001};
ktA = {0.02};
kdephA = {0.1};
TlongA = {Infinity};
ΔAA = {15};
τA = {0.6};
aA = {1.} * 0.176;

PTab = Flatten[Table[{ks, kt, kdeph, Tlong, ΔA, τ, a}, {ks, ksA}, {kt, ktA},
  {kdeph, kdephA}, {Tlong, TlongA}, {ΔA, ΔAA}, {τ, τA}, {a, aA}], 6]
Np = Dimensions[PTab][[1]]
{{0.001, 0.02, 0.1, ∞, 15, 0.6, 0.176}}

1

SETS1 =
  {"kCS", "krCS", "kf", "ks", "kt", "kSTD", "Tlong", "τ", "2J,G", "ΔA,G", "a,G"},
  {kCS, krCS, kf, ksA, ktA, kdephA, TlongA, τA, 2 J / 0.176, ΔAA, aA / 0.0176}};

SETS1 // TableForm

```

| kCS | krCS  | kf   | ks    | kt   | k <sub>STD</sub> | Tlong | τ   | 2J,G | ΔA,G | a,G |
|-----|-------|------|-------|------|------------------|-------|-----|------|------|-----|
| 1.  | 0.025 | 0.25 | 0.001 | 0.02 | 0.1              | ∞     | 0.6 | 10.  | 15   | 10. |

## Observables of pure CSS dynamics

```

RPvsB = ConstantArray[0, {Np, nSel, 1000}];
(*total RP population in calculation without reversible S1 formation*)
TRPvsB = ConstantArray[0, {Np, nSel, 1000}]; (*triplet part of
  RP population in calculation without reversible S1 formation*)
SRPvsB = ConstantArray[0, {Np, nSel, 1000}];
(*singlet part of RP population in
  calculation without reversible S1 formation*)

```

## Observables of S1-coupled CSS dynamics

```

RPvsB225 = ConstantArray[0, {Np, nSel, 1000}];
(*total population (S1+RP) in calculation with reversible S1 formation*)
SRPvsB225 = ConstantArray[0, {Np, nSel, 1000}];
(*singlet RP population in calculation with reversible S1 formation*)
TRPvsB225 = ConstantArray[0, {Np, nSel, 1000}];
(*triplet RP population in calculation with reversible S1 formation*)
RPvsB225CSS = ConstantArray[0, {Np, nSel, 1000}];
(*total RP population in calculation with reversible S1 formation*)
S1pop225 = ConstantArray[0, {Np, nSel, 1000}];
(* (100x) S1-population in calculation with reversible S1 formation*)

```

```

Np = Dimensions[PTab][[1]]
PTab // TableForm
1
0.001  0.02  0.1  ∞  15  0.6  0.176

```

## Quantum Dynamics Calculation

```

time0 = TimeUsed[];
Do[
  Do[
    (
      ω0 = FeldSel[[n]] * 0.176; (*FeldM0[[n]]*0.176  B0[[n]]*10*0.0176*)
      {ks, kt, kdep, Tlong, ΔA, τ, a} = PTab[[np]];
      DAR = (ΔA * ΔA) * 0.0176^2;
      H = a * (INx.S1x + INy.S1y + INz.S1z) +
          ω0 (S1z + S2z) - 2 J (S1x.S2x + S1y.S2y + S1z.S2z);
      Ω = H - 1 / 2 I * (ks * QS + kt * QT);
      UT = Eigensystem[Ω];
      UTH = Eigensystem[H];
      U = UT[[2]]^T;
      UH = UTH[[2]]^T;
      ω = DiagonalMatrix[UT[[1]]];
      ωH = DiagonalMatrix[UTH[[1]]];
      S1ω = ArrayPad[ω, 3, 0];
      S1ωH = ArrayPad[ω, 3, 0];
      (*Superoperators*)
      Usup = KroneckerProduct[U, U*];
      Usupm1 = Inverse[Usup];
      λsup = -KroneckerProduct[ω, U12] + KroneckerProduct[U12, ω*];
      Hsup = KroneckerProduct[H, U12] - KroneckerProduct[U12, H^T];
      Ksup = 1 / 2 * ks * (KroneckerProduct[QS, U12] + KroneckerProduct[U12, QS^T]) +
          1 / 2 * kt * (KroneckerProduct[QT, U12] + KroneckerProduct[U12, QT^T]);

      (*Relaxation*)
      Jsup = DiagonalMatrix[τ / (1 - I * τ * Diagonal[λsup])];
      Ha1 = S1z.INz - 0.25 * (S1p.INm + S1m.INp);
      Ha21 = S1p.INz + S1z.INp;
      Ha22 = S1m.INz + S1z.INm;
      Ha31 = S1p.INp;
      Ha32 = S1m.INm;
      Halsup = KroneckerProduct[Ha1, U12] - KroneckerProduct[U12, Ha1^T];
      Ha21sup = KroneckerProduct[Ha21, U12] - KroneckerProduct[U12, Ha21^T];
      Ha22sup = KroneckerProduct[Ha22, U12] - KroneckerProduct[U12, Ha22^T];
      Ha31sup = KroneckerProduct[Ha31, U12] - KroneckerProduct[U12, Ha31^T];
      Ha32sup = KroneckerProduct[Ha32, U12] - KroneckerProduct[U12, Ha32^T];
      RNZ11 = -4 / 45 * DAR * Halsup^T*.Usup.Jsup.Usupm1.Halsup // Simplify;
      RNZ21 = -1 / 30 * DAR * Ha21sup^T*.Usup.Jsup.Usupm1.Ha21sup // Simplify;
      RNZ22 = -1 / 30 * DAR * Ha22sup^T*.Usup.Jsup.Usupm1.Ha22sup // Simplify;
    )
  ]
]

```





```

JG = Jsup;
R1x = -B00 * B00 * GG1 * S1xsupT * Usup * JG * Usupm1 * S1xsup / 40;
R1y = -B00 * B00 *
      GG1 * S1ysupT * Usup * JG * Usupm1 * S1ysup / 40;
R1z = -2.0 * B00 * B00 * GG1 * S1zsupT * Usup * JG * Usupm1 * S1zsup / 60.0;

R2x = -B00 * B00 * GG2 * S2xsupT * Usup * JG * Usupm1 * S2xsup / 40;
R2y = -B00 * B00 * GG2 * S2ysupT * Usup * JG * Usupm1 * S2ysup / 40;
R2z = -2.0 * B00 * B00 * GG2 * S2zsupT * Usup * JG * Usupm1 * S2zsup / 60.0;

Rgta = R1x + R1y + R1z + R2x + R2y + R2z;

LsupR = (-I * Hsup - Ksup + RNZ +
         RNZJ + ZeemRephase + ZeemRelaxT1 + Rgta) // Chop;

(*Ergebnisse für rein innere CSS Kinetik *)
dt = 1;
Prop = MatrixExp[LsupR * dt];
RF = Flatten[QS / Tr[QS]];
(*RF=Flatten[U12/12];*)

time0 = TimeUsed[];
(*bei den folgenden Zeilen wurde darauf geachtet,
dass jeder Befehl in einer eigenen Zeile steht:*)
Do[RPvsB[[np, n, i]] = {(i - 1) * dt, Tr[ArrayReshape[RF, {12, 12}]] // Chop};
SRPvsB[[np, n, i]] = {(i - 1) * dt, Tr[QS.ArrayReshape[RF, {12, 12}]] // Chop};
RF = Prop.RF, {i, 1000}];
timea = TimeUsed[];

(*New addition to
include reversible S1 coupling*)
kontrolle = Table[LsupRM4[[a, b, c, d, as, bs, cs, ds]] =
  LsupR[[linNr144[a, b, c, d], linNr144[as, bs, cs, ds]]], {d,
  3}, {c, 4}, {b, 3}, {a, 4}, {ds, 3}, {cs, 4}, {bs, 3}, {as, 4}];
Do[LsupRM5[[a, b, c, d, as, bs, cs, ds]] =
  LsupRM4[[a, b, c, d, as, bs, cs, ds]], {d, 3}, {c, 4},
  {b, 3}, {a, 4}, {ds, 3}, {cs, 4}, {bs, 3}, {as, 4}];
Do[LsupR225[[linNr225[a, b, c, d], linNr225[as, bs, cs, ds]]] =
  LsupRM5[[a, b, c, d, as, bs, cs, ds]], {as, 5},
  {bs, 3}, {cs, 4}, {ds, 3}, {a, 5}, {b, 3}, {c, 4}, {d, 3}];
LsupR225kfkCSkrCS = LsupR225 - (kf + kCS) * QS1sup +
  krCS * S1ausrCS + kCS * SCSSausCS - krCS * SCSSperkrCR;

dt = 1;
Prop225kfkCSkrCS = MatrixExp[LsupR225kfkCSkrCS * dt];
RFS1 = Flatten[QS1 / Tr[QS1]];

timeb0 = TimeUsed[];
Do[X = ArrayReshape[RFS1, {15, 15}] // Chop;
SRPvsB225[[np, n, i]] = {(i - 1) * dt, Tr[QS15.X]};

```

```

    RPsB225[[np, n, i]] = {(i - 1) * dt, Tr[U1512.X]};
    S1pop225[[np, n, i]] = {(i - 1) * dt, 100 * Tr[QS1.X]};
    RFS1 = Prop225kfkCSkrCS.RFS1;, {i, 1000}];
    If[n == 1, WriteString[$Output, "\n", n, " ", np, "    "],
      WriteString[$Output, n, " ", np, "    "]];
    timeb = TimeUsed[]
  }
  {n, nSel}];
  x = 1.23,
  {np, Np}]
time1 = TimeUsed[];
Dauera = timea - time0
Dauerb = timeb - timeb0
Dauer = time1 - time0

1 1    2 1    3 1    4 1    5 1    6 1    7 1    8 1    9 1    10 1    11 1    12 1    13 1    14
0.078
0.093
0.578

SRPsB[[1, 1, 1 ;; 10]]
{{0, 1}, {1, 0.983246}, {2, 0.971729}, {3, 0.975986}, {4, 0.968114},
 {5, 0.954095}, {6, 0.952964}, {7, 0.950201}, {8, 0.938181}, {9, 0.932325}}

Dimensions[SRPsB]
{1, 20, 1000, 2}

DCyan = RGBColor[0, 0.2, 0.2]
RGBColor[0, 0.2, 0.2]

```

```
ListLogPlot[{SRPvsB225[[1, 1]], Slpop225[[1, 1]], SRPvsB[[1, 1]]}, PlotStyle ->
  {{Thick, Blue}, {Thick, Red}, {Thick, Black}, {Thick, Orange}, {Thick, Cyan}},
  BaseStyle -> {FontFamily -> "Arial", FontWeight -> "Bold", FontSize -> 16},
  PlotRange -> {{0.0, 100}, {0.3, 10}},
  Joined -> True, ImageSize -> 400, AspectRatio -> 0.9]
```

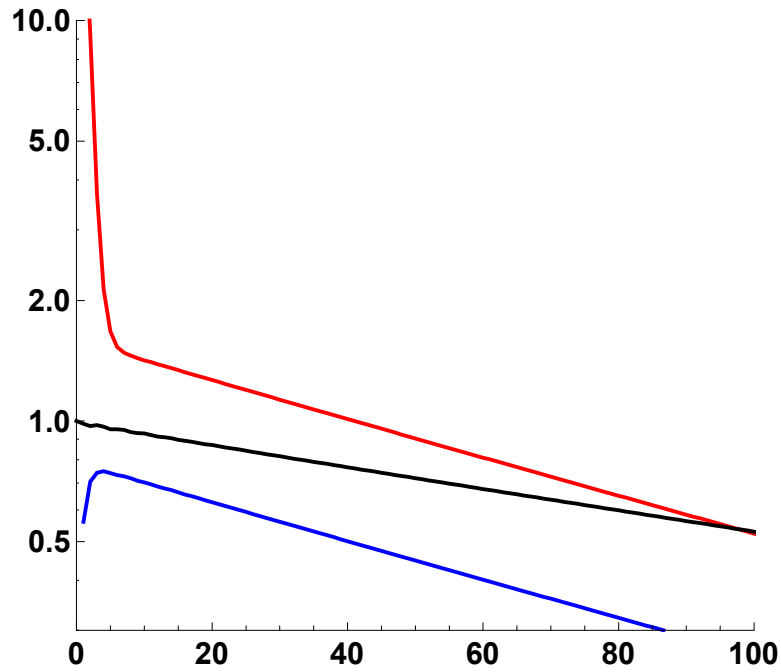

```
FeldSel
```

```
{0, 2, 5, 7, 9, 10, 11, 12, 13, 15, 17, 20, 25, 30, 40, 50, 60, 80, 100, 200}
```

```
FeldSel[[9]]
```

```
13
```

```
n = 6;
ListLogPlot[{SRPvsB225[[1, n]], S1pop225[[1, n]], SRPvsB[[1, n]]}, PlotStyle ->
  {{Thick, Blue}, {Thick, Red}, {Thick, Black}, {Thick, Orange}, {Thick, Cyan}},
  BaseStyle -> {FontFamily -> "Arial", FontWeight -> "Bold", FontSize -> 16},
  PlotRange -> {{0.0, 1000}, {0.0001, 105}},
  Joined -> True, ImageSize -> 400, AspectRatio -> 0.9,
  Epilog -> Inset[Style[StringJoin["Tlong= ", ToString[Tlong], " ", "J= ",
    ToString[J / 0.176], " mT", " B= ", ToString[FeldSel[[n]]], " mT",
    "\n", " kdeph= ", ToString[kdeph], " kt= ", ToString[kt], " ΔA/G = ",
    ToString[ΔA], " a/G= ", ToString[a / 0.0176]], Bold, 14], {500, 2.5}]]
```

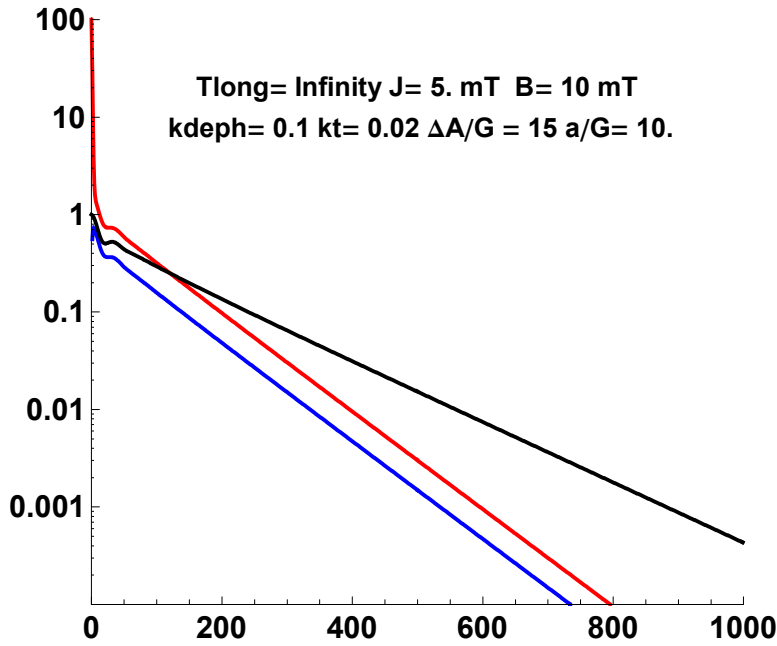

```
Epilog -> Inset[
  Style[StringJoin["Tlong= ", ToString[Tlong], " ", "J= ", ToString[J / 0.176],
    " mT", " B= ", ToString[FeldSel[[n]]], " mT", "\n", " kdeph= ",
    ToString[kdeph], " kt= ", ToString[kt], " ΔA= ", ToString[ΔA],
    " a/G= ", ToString[a / 0.0176]], Bold, 14], {500, 2.5}]]
```

```
Epilog -> Inset[Tlong= Infinity J= 5. mT B= 10 mT
  kdeph= 0.1 kt= 0.02 ΔA= 15 a/G= 10., {500, 2.5}]]
```

SETS1 // TableForm

```
Xa0 = Table[ListLogPlot[{RPvsB225[[1, n]], S1pop225[[1, n]], RPvsB[[1, n]]},
  PlotStyle -> {{Thick, Blue}, {Thick, Red},
    {Thick, Black}, {Thick, Orange}, {Thick, Cyan}},
  BaseStyle -> {FontFamily -> "Arial", FontWeight -> "Bold", FontSize -> 16},
  PlotRange -> {{0.0, 1000}, {0.0001, 105}},
  Joined -> True, ImageSize -> 300, AspectRatio -> 0.9,
  Epilog -> Inset[StringJoin["B0 = ", ToString[FeldSel[[n]]]], {600, 1}],
  Frame -> True, FrameLabel -> {"time, ns", "population, %"}, {n, nSel}];
```

| kCS | krCS  | kf   | ks    | kt   | k <sub>STD</sub> | Tlong | τ   | 2J,G | ΔA,G | a,G |
|-----|-------|------|-------|------|------------------|-------|-----|------|------|-----|
| 1.  | 0.025 | 0.25 | 0.001 | 0.02 | 0.1              | ∞     | 0.6 | 10.  | 15   | 10. |

```
xa0[{{1, 10, 20}}]
```

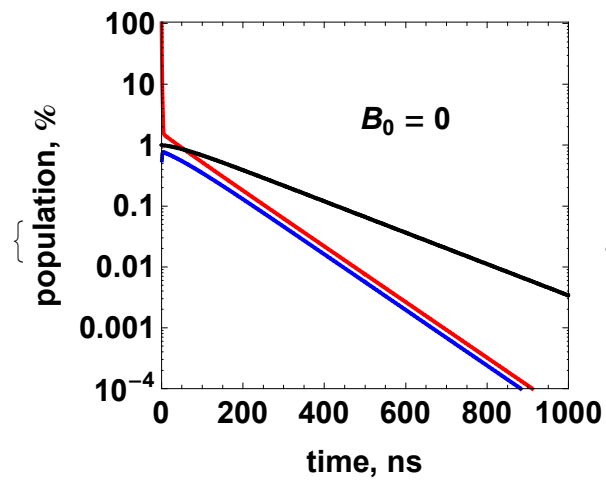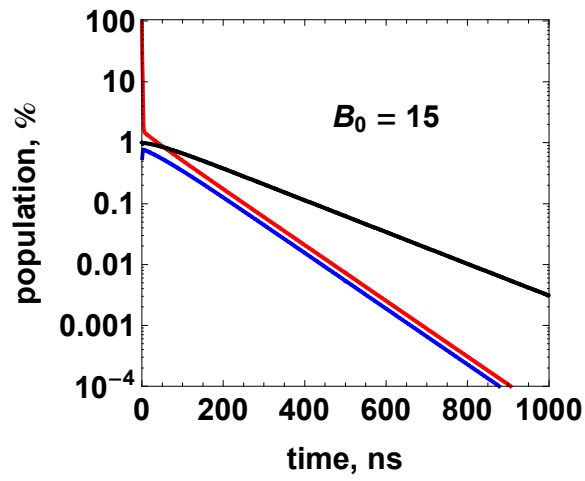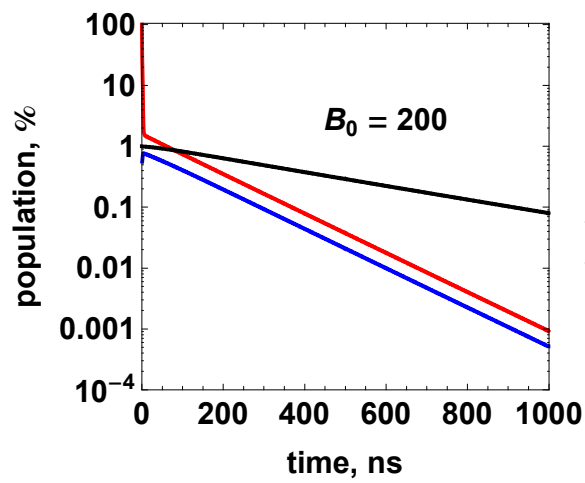

# Determination of exponential rate constants

```
=====
=====
```

## RPvsB225

```
Lsl[x_, xa_, xb_] := Log[x[[xa, 2]] / x[[xb, 2]]] / (x[[xb, 1]] - x[[xa, 1]])
LA[x_, xa_, xb_] := Exp[Log[x[[xa, 2]]] + Lsl[x, xa, xb] * x[[xa, 1]]]
kCSS = ConstantArray[0, {Np, nSel, 2}];
ACSS = ConstantArray[0, {Np, nSel, 2}];
Do[(
  m = Lsl[RPvsB225[[np, n]], 200, 400] // Chop;
  Amp = LA[RPvsB225[[np, n]], 200, 400] // Chop;
  ACSS[[np, n]] = {FeldSel[[n]], Amp};
  kCSS[[np, n]] = {FeldSel[[n]], 10^9 m},
  {np, Np}, {n, nSel}]

kCSS
{{{0, 1.04243 × 107}, {2, 1.05383 × 107}, {5, 1.09804 × 107}, {7, 1.14919 × 107},
 {9, 1.1724 × 107}, {10, 1.16817 × 107}, {11, 1.16346 × 107}, {12, 1.15266 × 107},
 {13, 1.12502 × 107}, {15, 1.04755 × 107}, {17, 9.85549 × 106}, {20, 9.21646 × 106},
 {25, 8.57113 × 106}, {30, 8.2066 × 106}, {40, 7.84896 × 106}, {50, 7.69023 × 106},
 {60, 7.60692 × 106}, {80, 7.52656 × 106}, {100, 7.49031 × 106}, {200, 7.44296 × 106}}}

RPsim = CSSsim = Table[{t, ACSS[[np, n, 2]] * Exp[-kCSS[[np, n, 2]] / 10^9 * t]},
  {np, Np}, {n, nSel}, {t, 0, 200, 2}];
```

```

n = 6; np = 1;
{ListPlot[{RPvsB225[[np, n]], RPsim[[np, n]]},
  PlotStyle -> {{Thick, Blue}, {Thick, Red}, {Thick, Black},
    {Thick, DCyan, Dashed}, {Thick, Black, Dashed}, {Thick, DCyan, Dashed}},
  PlotRange -> {{0.0, 500}, {0.0, 1.05}}, Joined -> True,
  BaseStyle -> {FontFamily -> "Arial", FontWeight -> "Bold", FontSize -> 16},
  AspectRatio -> 0.9, ImageSize -> 300, Frame -> True,
  FrameLabel -> {"time, ns", "population, %"},
  Epilog -> Inset[StringJoin["B= ", ToString[FeldSel[[n]]], " mT"], {300, 0.6}]],
ListLogPlot[{RPvsB225[[np, n]], RPsim[[np, n]]},
  PlotStyle -> {{Thick, Blue}, {Thick, Red}, {Thick, Black},
    {Thick, DCyan, Dashed}, {Thick, Black, Dashed}, {Thick, DCyan, Dashed}},
  PlotRange -> {{0.0, 500}, {0.0001, 10}}, Joined -> True,
  BaseStyle -> {FontFamily -> "Arial", FontWeight -> "Bold", FontSize -> 16},
  AspectRatio -> 0.9, ImageSize -> 300, Frame -> True,
  FrameLabel -> {"time, ns", "population, %"}, Epilog ->
  Inset[StringJoin["B= ", ToString[FeldSel[[n]]], " mT"], {300, Log[1]}]]}

```

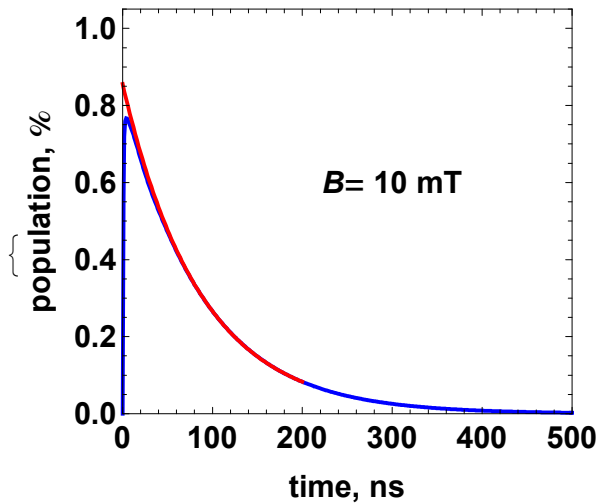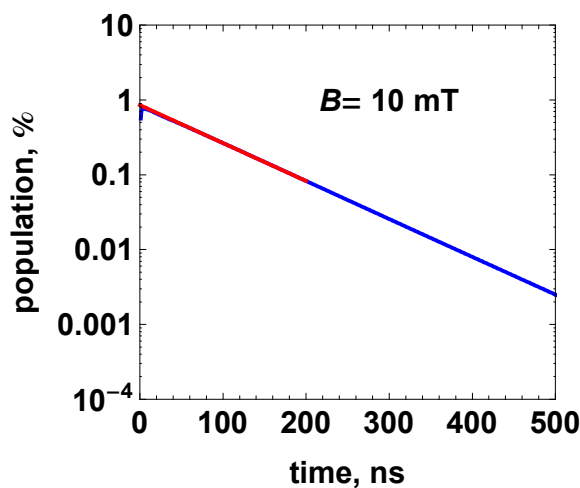

FeldSel

```
{0, 2, 5, 7, 9, 10, 11, 12, 13, 15, 17, 20, 25, 30, 40, 50, 60, 80, 100, 200}
```

```
=====
```

```
=====
```

## S1pop225

```
Lsl[x_, xa_, xb_] := Log[x[[xa, 2]] / x[[xb, 2]] / (x[[xb, 1]] - x[[xa, 1]])
LA[x_, xa_, xb_] := Exp[Log[x[[xa, 2]]] + Lsl[x, xa, xb] * x[[xa, 1]]]
kslowMq = ConstantArray[0, {Np, nSel, 2}];
AslowMq = ConstantArray[0, {Np, nSel, 2}];
Do[(
  m = Lsl[S1pop225[[np, n]], 200, 400] // Chop;
  Amp = LA[S1pop225[[np, n]], 200, 400] // Chop;
  AslowMq[[np, n]] = {FeldSel[[n]], Amp};
  kslowMq[[np, n]] = {FeldSel[[n]], 10^9 m}),
  {np, Np}, {n, nSel}]

kslowMq
{{{0, 1.0565 × 107}, {2, 1.06843 × 107}, {5, 1.11238 × 107}, {7, 1.15653 × 107},
 {9, 1.16631 × 107}, {10, 1.16251 × 107}, {11, 1.15791 × 107}, {12, 1.15032 × 107},
 {13, 1.13016 × 107}, {15, 1.05916 × 107}, {17, 9.96143 × 106}, {20, 9.30117 × 106},
 {25, 8.63384 × 106}, {30, 8.25649 × 106}, {40, 7.88579 × 106}, {50, 7.72113 × 106},
 {60, 7.63469 × 106}, {80, 7.55131 × 106}, {100, 7.51369 × 106}, {200, 7.46457 × 106}}}

S1sim = Table[{t, AslowMq[[np, n, 2]] * Exp[-kslowMq[[np, n, 2]] / 10^9 * t]},
  {np, Np}, {n, nSel}, {t, 0, 400, 2}];

n = 6;
ListPlot[{S1pop225[[1, n]], S1sim[[1, n]]},
  PlotStyle → {{Thick, Blue}, {Thick, Red}, {Thick, Black}},
  PlotRange → {{0.0, 500}, {0.0, 2}}, Joined → True,
  BaseStyle -> {FontFamily → "Arial", FontWeight → "Bold", FontSize → 16},
  AspectRatio → 0.9, ImageSize → 400, Frame → True,
  FrameLabel → {"time, ns", "population, %"}]
```

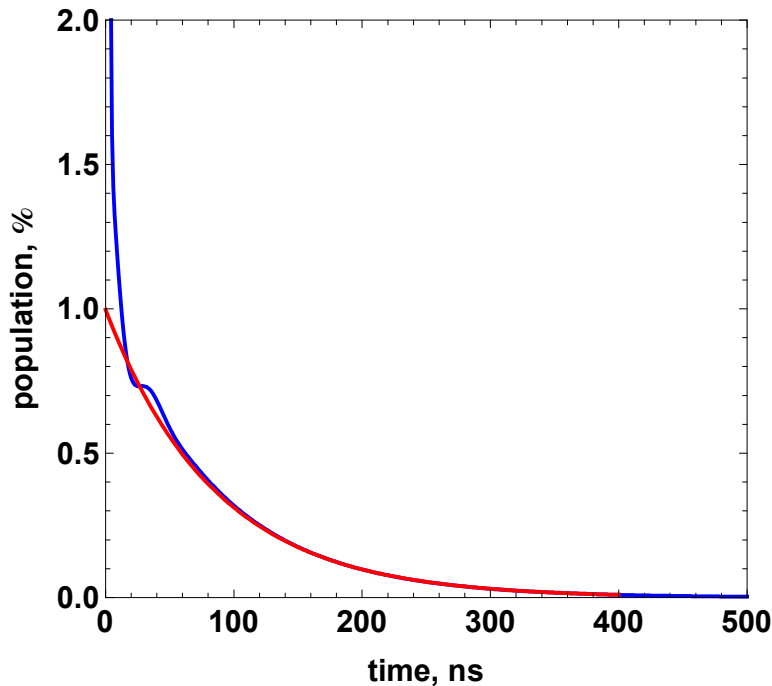

```

n = 8;
{ListPlot[{S1pop225[[1, n]], S1sim[[1, n]]},
  PlotStyle -> {{Thick, Blue}, {Thick, Red}, {Thick, Black},
    {Thick, DCyan, Dashed}, {Thick, Black, Dashed}, {Thick, DCyan, Dashed}},
  PlotRange -> {{0.0, 500}, {0.0, 1.05}}, Joined -> True,
  BaseStyle -> {FontFamily -> "Arial", FontWeight -> "Bold", FontSize -> 16},
  AspectRatio -> 0.9, ImageSize -> 300, Frame -> True,
  FrameLabel -> {"time, ns", "population, %"},
  Epilog -> Inset[StringJoin["B= ", ToString[FeldSel[[n]]], " mT"], {300, 0.6}]],
ListLogPlot[{S1pop225[[1, n]], S1sim[[1, n]]},
  PlotStyle -> {{Thick, Blue}, {Thick, Red}, {Thick, Black},
    {Thick, DCyan, Dashed}, {Thick, Black, Dashed}, {Thick, DCyan, Dashed}},
  PlotRange -> {{0.0, 500}, {0.0001, 10}}, Joined -> True,
  BaseStyle -> {FontFamily -> "Arial", FontWeight -> "Bold", FontSize -> 16},
  AspectRatio -> 0.9, ImageSize -> 300, Frame -> True,
  FrameLabel -> {"time, ns", "population, %"}, Epilog ->
  Inset[StringJoin["B= ", ToString[FeldSel[[n]]], " mT"], {300, Log[1]}]]}

```

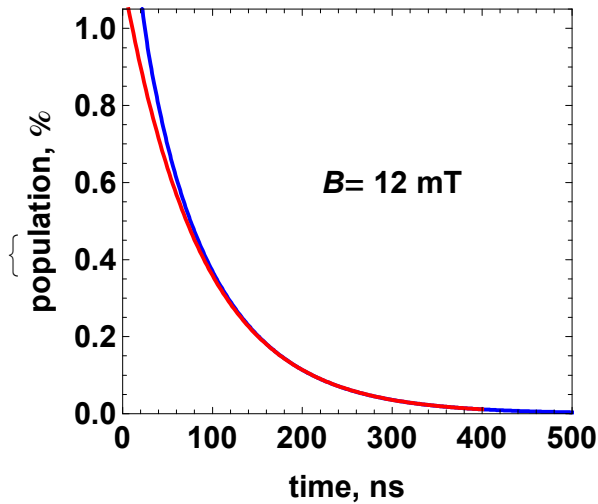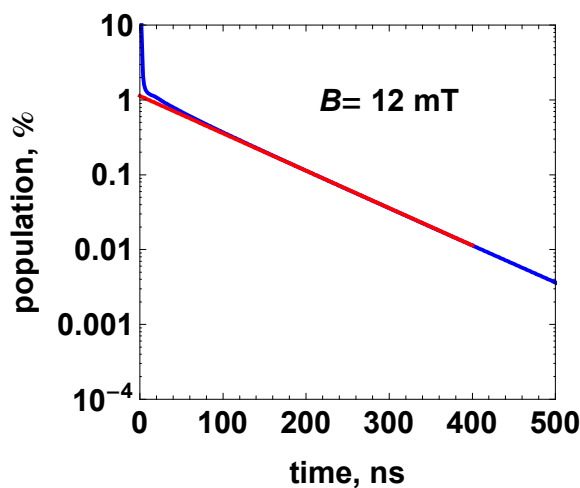

```

=====
=====

```

# scS1-model Auswertung k1CSSscl

```

Lsl[x_, xa_, xb_] := Log[x[[xa, 2]] / x[[xb, 2]]] / (x[[xb, 1]] - x[[xa, 1]])
LA[x_, xa_, xb_] := Exp[Log[x[[xa, 2]]] + Lsl[x, xa, xb] * x[[xa, 1]]]
k1CSSscl = ConstantArray[0, {Np, nSel, 2}];
A1CSSscl = ConstantArray[0, {Np, nSel, 2}];
Do[(
  m = Lsl[SRPvsB[[np, n]], 200, 400] // Chop;
  Amp = LA[SRPvsB[[np, n]], 200, 400] // Chop;
  A1CSSscl[[np, n]] = {FeldSel[[n]], Amp};
  k1CSSscl[[np, n]] = {FeldSel[[n]], 10^9 m}),
  {np, Np}, {n, nSel}]

A1CSSscl
{{{0, 0.954289}, {2, 0.951984}, {5, 0.927123}, {7, 0.847984},
 {9, 0.63461}, {10, 0.588165}, {11, 0.613789}, {12, 0.715639},
 {13, 0.833851}, {15, 0.933431}, {17, 0.956702}, {20, 0.970022},
 {25, 0.979021}, {30, 0.982161}, {40, 0.983863}, {50, 0.984219},
 {60, 0.984319}, {80, 0.984366}, {100, 0.984372}, {200, 0.984367}}}

k1CSSscl
{{{0, 5.94577 × 106}, {2, 6.0736 × 106}, {5, 6.63128 × 106}, {7, 7.28531 × 106},
 {9, 7.42776 × 106}, {10, 7.33649 × 106}, {11, 7.31215 × 106}, {12, 7.28945 × 106},
 {13, 7.01092 × 106}, {15, 6.0341 × 106}, {17, 5.27961 × 106}, {20, 4.54211 × 106},
 {25, 3.82707 × 106}, {30, 3.43261 × 106}, {40, 3.0509 × 106}, {50, 2.88301 × 106},
 {60, 2.79525 × 106}, {80, 2.71083 × 106}, {100, 2.67282 × 106}, {200, 2.62324 × 106}}}

SCSSsclsim = Table[{t, A1CSSscl[[np, n, 2]] * Exp[-k1CSSscl[[np, n, 2]] / 10^9 * t]},
  {np, Np}, {n, nSel}, {t, 0, 400, 2}];

n = 8;
{ListPlot[{SRPvsB[[1, n]], SCSSsclsim[[1, n]]},
  PlotStyle → {{Thick, Blue}, {Thick, Red}, {Thick, Black},
    {Thick, DCyan, Dashed}, {Thick, Black, Dashed}, {Thick, DCyan, Dashed}},
  PlotRange → {{0.0, 500}, {0.0, 1.05}}, Joined → True,
  BaseStyle → {FontFamily → "Arial", FontWeight → "Bold", FontSize → 16},
  AspectRatio → 0.9, ImageSize → 400, Frame → True,
  FrameLabel → {"time, ns", "population, %"},
  Epilog → Inset[StringJoin["B= ", ToString[FeldSel[[n]]], " mT"], {300, 0.6}]},
ListLogPlot[{SRPvsB[[1, n]], SCSSsclsim[[1, n]]},
  PlotStyle → {{Thick, Blue}, {Thick, Red}, {Thick, Black},
    {Thick, DCyan, Dashed}, {Thick, Black, Dashed}, {Thick, DCyan, Dashed}},
  PlotRange → {{0.0, 500}, {0.0001, 10}}, Joined → True,
  BaseStyle → {FontFamily → "Arial", FontWeight → "Bold", FontSize → 16},
  AspectRatio → 0.9, ImageSize → 400, Frame → True,
  FrameLabel → {"time, ns", "population, %"}, Epilog →
  Inset[StringJoin["B= ", ToString[FeldSel[[n]]], " mT"], {300, Log[1]}]}

```

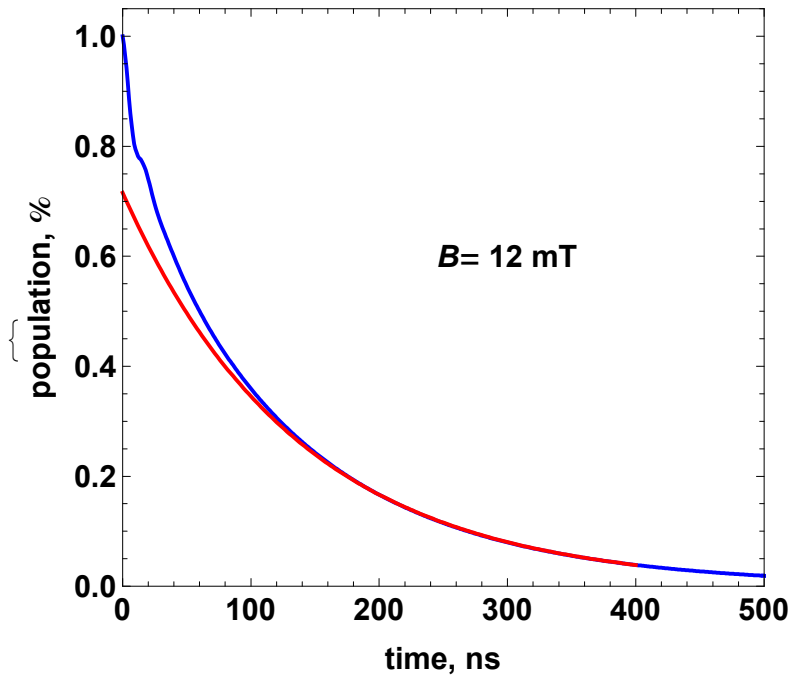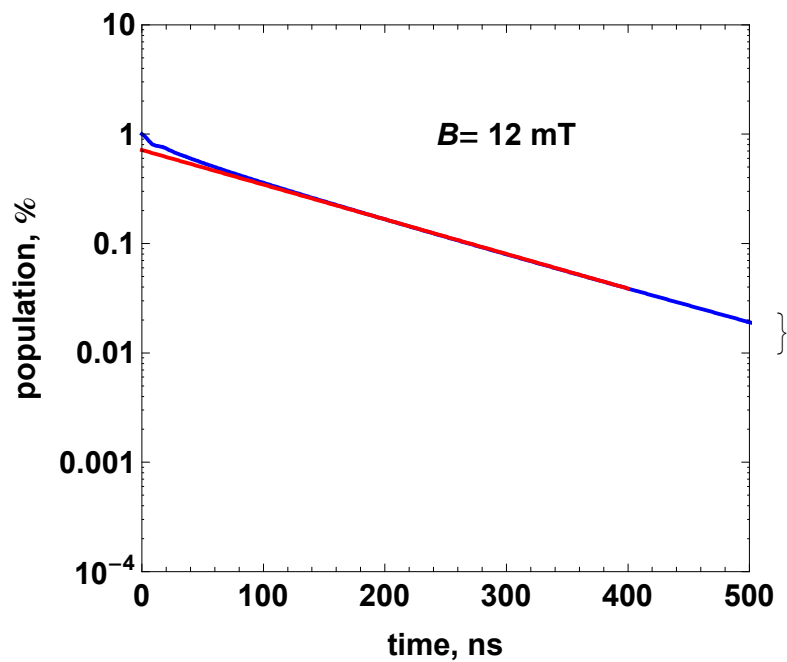

kdeph

0.

**scS1-model Auswertung kCSSscl**

```

Lsl[x_, xa_, xb_] := Log[x[[xa, 2]] / x[[xb, 2]] / (x[[xb, 1]] - x[[xa, 1]])
LA[x_, xa_, xb_] := Exp[Log[x[[xa, 2]]] + Lsl[x, xa, xb] * x[[xa, 1]]]
kCSSscl = ConstantArray[0, {Np, nSel, 2}];
ACSSscl = ConstantArray[0, {Np, nSel, 2}];
Do[(
  m = Lsl[RPvsB[[np, n]], 200, 400] // Chop;
  Amp = LA[RPvsB[[np, n]], 200, 400] // Chop;
  ACSSscl[[np, n]] = {FeldSel[[n]], Amp};
  kCSSscl[[np, n]] = {FeldSel[[n]], 10^9 m}),
  {np, Np}, {n, nSel}]

kCSSscl

{{{0, 5.89933 × 106}, {2, 6.02527 × 106}, {5, 6.58402 × 106}, {7, 7.2964 × 106},
  {9, 7.61971 × 106}, {10, 7.52607 × 106}, {11, 7.50077 × 106}, {12, 7.41938 × 106},
  {13, 7.03683 × 106}, {15, 5.99726 × 106}, {17, 5.2482 × 106}, {20, 4.51965 × 106},
  {25, 3.8116 × 106}, {30, 3.42096 × 106}, {40, 3.04328 × 106}, {50, 2.87727 × 106},
  {60, 2.79051 × 106}, {80, 2.70707 × 106}, {100, 2.66949 × 106}, {200, 2.62049 × 106}}}

CSSsclsim = Table[{t, ACSSscl[[np, n, 2]] * Exp[-kCSSscl[[np, n, 2]] / 10^9 * t]},
  {np, Np}, {n, nSel}, {t, 0, 400, 2}];

n = 8;
{ListPlot[{RPvsB[[1, n]], CSSsclsim[[1, n]]},
  PlotStyle → {{Thick, Blue}, {Thick, Red}, {Thick, Black},
    {Thick, DCyan, Dashed}, {Thick, Black, Dashed}, {Thick, DCyan, Dashed}},
  PlotRange → {{0.0, 500}, {0.0, 1.05}}, Joined → True,
  BaseStyle → {FontFamily → "Arial", FontWeight → "Bold", FontSize → 16},
  AspectRatio → 0.9, ImageSize → 400, Frame → True,
  FrameLabel → {"time, ns", "population, %"},
  Epilog → Inset[StringJoin["B= ", ToString[FeldSel[[n]]], " mT"], {300, 0.6}]},
ListLogPlot[{RPvsB[[1, n]], CSSsclsim[[1, n]]},
  PlotStyle → {{Thick, Blue}, {Thick, Red}, {Thick, Black},
    {Thick, DCyan, Dashed}, {Thick, Black, Dashed}, {Thick, DCyan, Dashed}},
  PlotRange → {{0.0, 500}, {0.0001, 10}}, Joined → True,
  BaseStyle → {FontFamily → "Arial", FontWeight → "Bold", FontSize → 16},
  AspectRatio → 0.9, ImageSize → 400, Frame → True,
  FrameLabel → {"time, ns", "population, %"}, Epilog →
  Inset[StringJoin["B= ", ToString[FeldSel[[n]]], " mT"], {300, Log[1]}]}

```

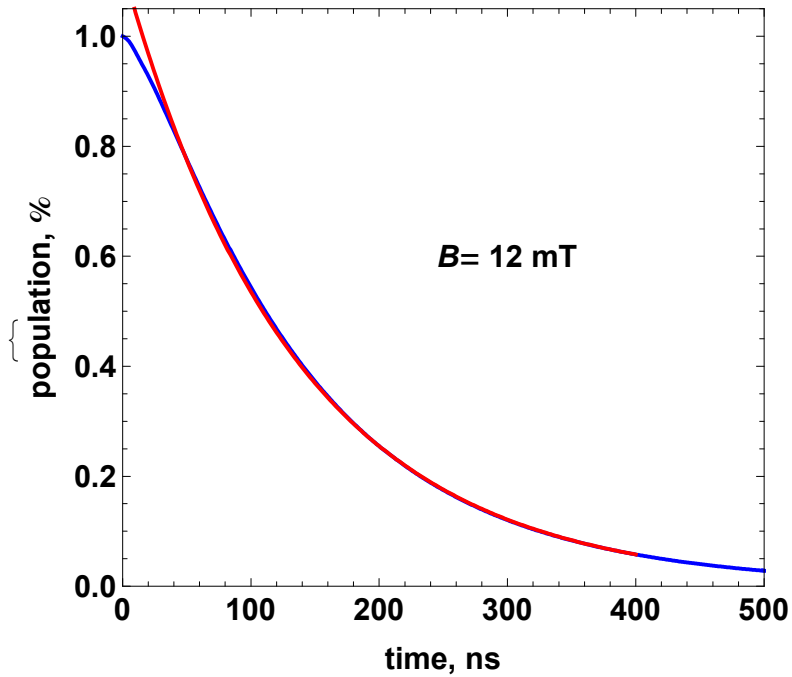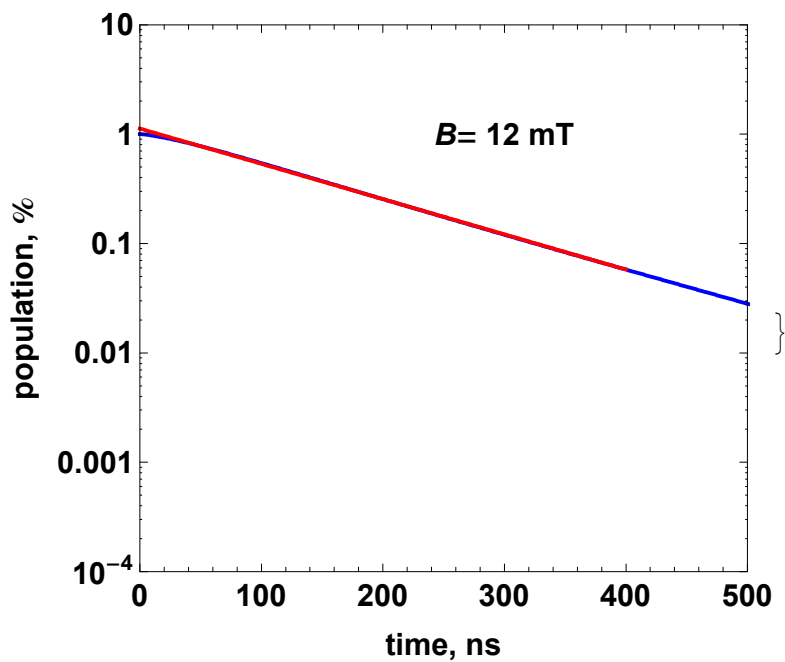

=====  
 =====

## SCSS225

```

Lsl[x_, xa_, xb_] := Log[x[[xa, 2]] / x[[xb, 2]]] / (x[[xb, 1]] - x[[xa, 1]])
lA[x_, xa_, xb_] := Exp[Log[x[[xa, 2]]] + Lsl[x, xa, xb] * x[[xa, 1]]]
k1CSS = ConstantArray[0, {Np, nSel, 2}];
A1CSS = ConstantArray[0, {Np, nSel, 2}];

```

```

Do[(
  m = Lsl[SRPvsB225[[np, n]], 200, 400] // Chop;
  Amp = LA[SRPvsB225[[np, n]], 200, 400] // Chop;
  A1CSS[[np, n]] = {FeldSel[[n]], Amp};
  k1CSS[[np, n]] = {FeldSel[[n]], 10^9 m},
  {np, Np}, {n, nSel}]

k1CSS
{{{0, 1.05647 × 107}, {2, 1.0684 × 107}, {5, 1.11233 × 107}, {7, 1.15645 × 107},
 {9, 1.16623 × 107}, {10, 1.16244 × 107}, {11, 1.15783 × 107}, {12, 1.15024 × 107},
 {13, 1.13009 × 107}, {15, 1.05913 × 107}, {17, 9.96118 × 106}, {20, 9.30097 × 106},
 {25, 8.63368 × 106}, {30, 8.25635 × 106}, {40, 7.88566 × 106}, {50, 7.721 × 106},
 {60, 7.63456 × 106}, {80, 7.55118 × 106}, {100, 7.51356 × 106}, {200, 7.46443 × 106}}}

SCSSsim = Table[{t, A1CSS[[np, n, 2]] * Exp[-k1CSS[[np, n, 2]] / 10^9 * t]},
  {np, Np}, {n, nSel}, {t, 0, 400, 2}];

n = 6;
{ListPlot[{SRPvsB225[[1, n]], SCSSsim[[1, n]]},
  PlotStyle → {{Thick, Blue}, {Thick, Red}, {Thick, Black},
    {Thick, DCyan, Dashed}, {Thick, Black, Dashed}, {Thick, DCyan, Dashed}},
  PlotRange → {{0.0, 500}, {0.0, 1.05}}, Joined → True,
  BaseStyle → {FontFamily → "Arial", FontWeight → "Bold", FontSize → 16},
  AspectRatio → 0.9, ImageSize → 400, Frame → True,
  FrameLabel → {"time, ns", "population, %"},
  Epilog → Inset[StringJoin["B= ", ToString[FeldSel[[n]]], " mT"], {300, 0.6}]],
ListLogPlot[{SRPvsB225[[1, n]], SCSSsim[[1, n]]},
  PlotStyle → {{Thick, Blue}, {Thick, Red}, {Thick, Black},
    {Thick, Cyan, Dashed}, {Thick, Black, Dashed}, {Thick, Cyan, Dashed}},
  PlotRange → {{0.0, 500}, {0.0001, 10}}, Joined → True,
  BaseStyle → {FontFamily → "Arial", FontWeight → "Bold", FontSize → 16},
  AspectRatio → 0.9, ImageSize → 400, Frame → True,
  FrameLabel → {"time, ns", "population, %"}, Epilog →
  Inset[StringJoin["B= ", ToString[FeldSel[[n]]], " mT"], {300, Log[1]}]]}

```

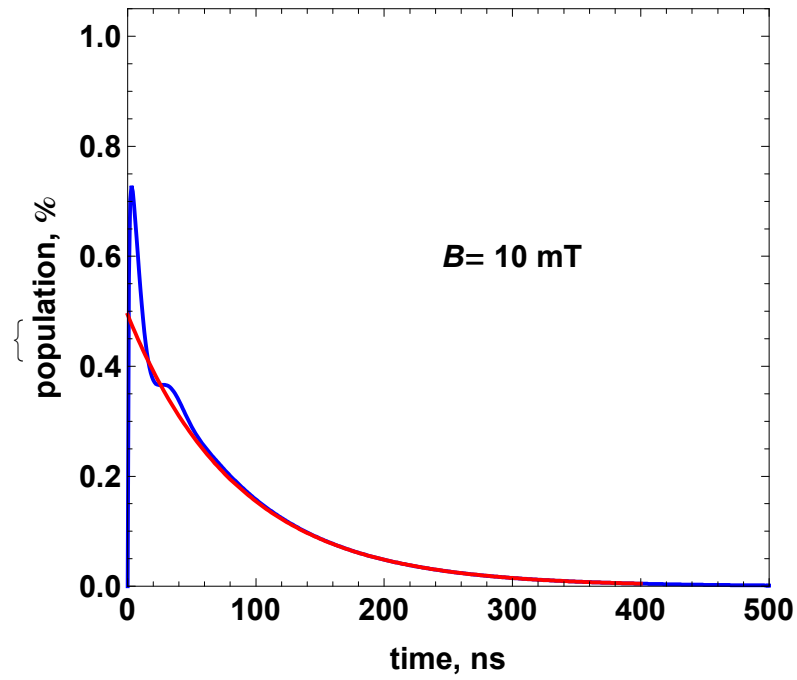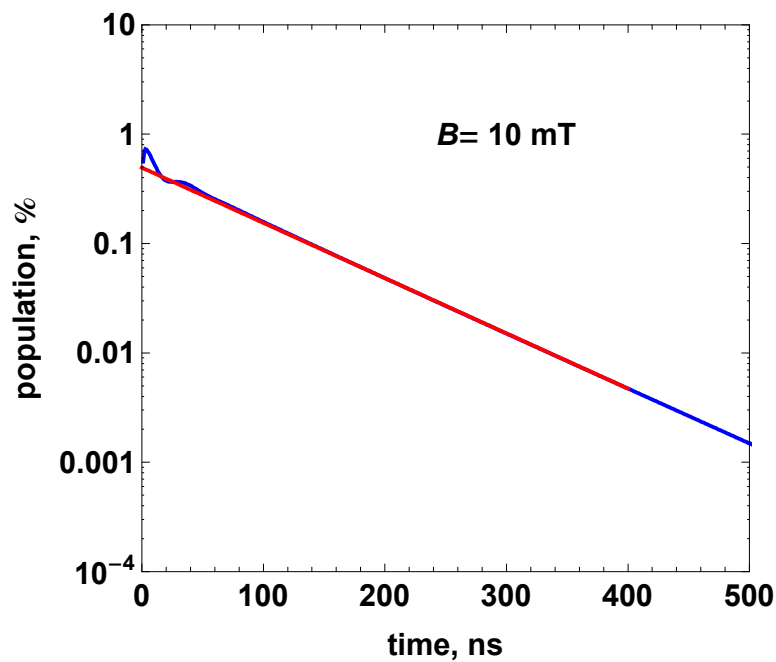

```
=====
```

```
=====
```

```
SETS1 // TableForm
```

| kCS | krCS  | kf   | ks    | kt   | k <sub>STD</sub> | Tlong    | $\tau$ | 2J,G | $\Delta A,G$ | a,G |
|-----|-------|------|-------|------|------------------|----------|--------|------|--------------|-----|
| 1.  | 0.025 | 0.25 | 0.001 | 0.02 | 0.1              | $\infty$ | 0.6    | 10.  | 15           | 10. |

Diagram selection

```
ListPlot[{S1pop225[[1, 1]], S1pop225[[1, 6]], S1pop225[[1, 16]]},
PlotStyle -> {{Thick, Blue}, {Thick, Red}, {Thick, Black}},
PlotRange -> {{0.0, 500}, {0.0, 2}}, Joined -> True,
BaseStyle -> {FontFamily -> "Arial", FontWeight -> "Bold", FontSize -> 16},
AspectRatio -> 0.9, ImageSize -> 400, Frame -> True,
FrameLabel -> {"time, ns", "population, %"}]
```

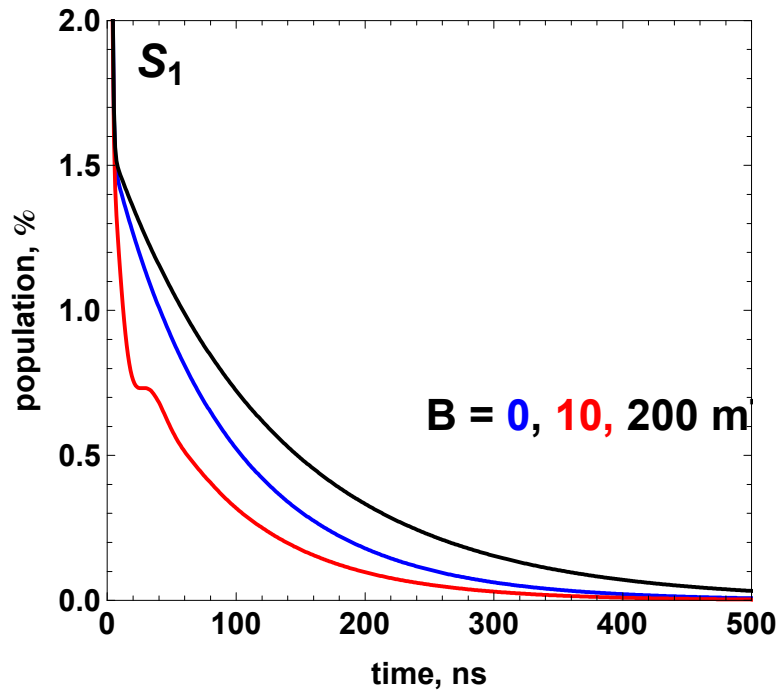

```
ListPlot[{SRPvsB225[[1, 1]], SRPvsB225[[1, 6]], SRPvsB225[[1, 16]]},
PlotStyle -> {{Thick, Blue}, {Thick, Red}, {Thick, Black}},
PlotRange -> {{0.0, 500}, {0.0, 1}}, Joined -> True,
BaseStyle -> {FontFamily -> "Arial", FontWeight -> "Bold", FontSize -> 16},
AspectRatio -> 0.9, ImageSize -> 400, Frame -> True,
FrameLabel -> {"time, ns", "population, %"}]
```

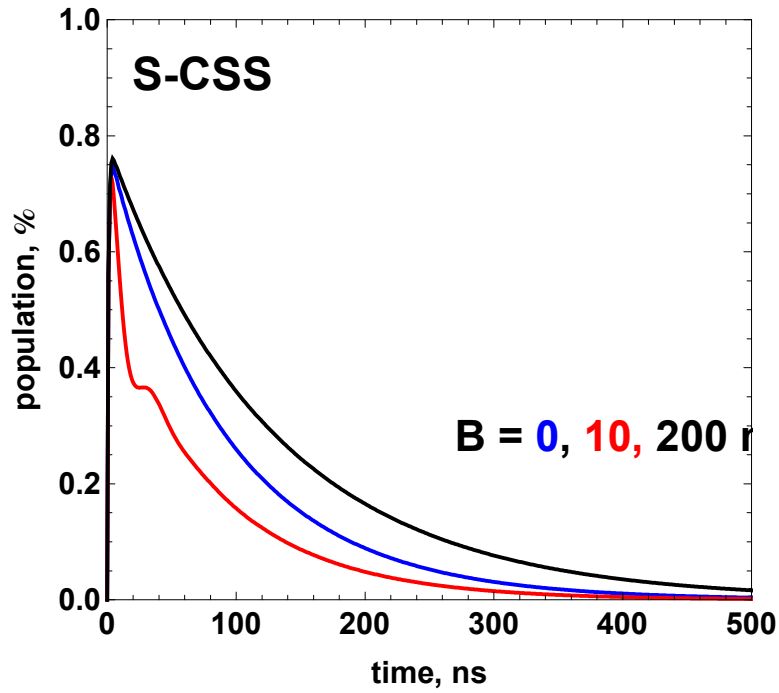

```
ListPlot[{RPvsB225[[1, 1]], RPvsB225[[1, 6]], RPvsB225[[1, 16]]},
  PlotStyle -> {{Thick, Blue}, {Thick, Red}, {Thick, Black}},
  PlotRange -> {{0.0, 500}, {0.0, 1}}, Joined -> True,
  BaseStyle -> {FontFamily -> "Arial", FontWeight -> "Bold", FontSize -> 16},
  AspectRatio -> 0.9, ImageSize -> 400, Frame -> True,
  FrameLabel -> {"time, ns", "population, %"}]
```

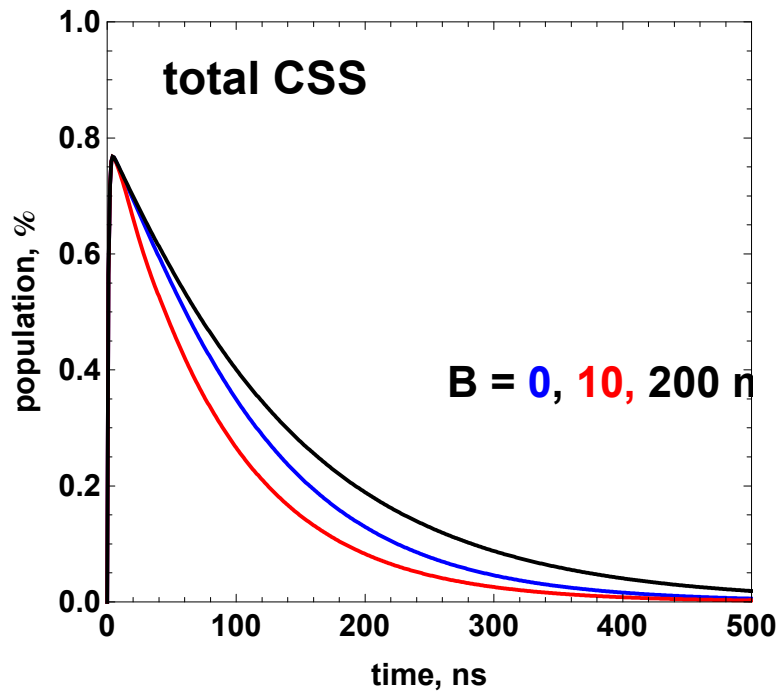

```
ListLogPlot[{S1pop225[[1, 1]], S1pop225[[1, 6]],
  S1pop225[[1, 16]], S1sim[[1, 1]], S1sim[[1, 6]], S1sim[[1, 16]]},
  PlotStyle -> {{Thick, Blue}, {Thick, Red}, {Thick, Black},
    {Thick, Gray}, {Thick, Gray}, {Thick, Gray}},
  PlotRange -> {{0.0, 500}, {0.001, 100}}, Joined -> True,
  BaseStyle -> {FontFamily -> "Arial", FontWeight -> "Bold", FontSize -> 16},
  AspectRatio -> 0.9, ImageSize -> 400, Frame -> True,
  FrameLabel -> {"time, ns", "population, %"}]
```

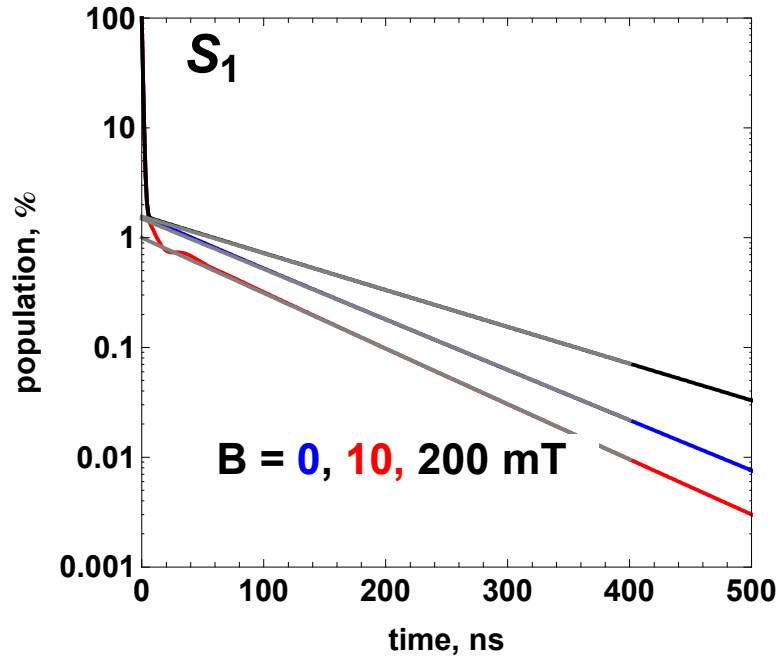

```
ListLogPlot[{SRPvsB225[[1, 1]], SRPvsB225[[1, 6]], SRPvsB225[[1, 16]]},
  PlotStyle -> {{Thick, Blue}, {Thick, Red}, {Thick, Black}},
  PlotRange -> {{0.0, 500}, {0.001, 100}}, Joined -> True,
  BaseStyle -> {FontFamily -> "Arial", FontWeight -> "Bold", FontSize -> 16},
  AspectRatio -> 0.9, ImageSize -> 400, Frame -> True,
  FrameLabel -> {"time, ns", "population"}]
```

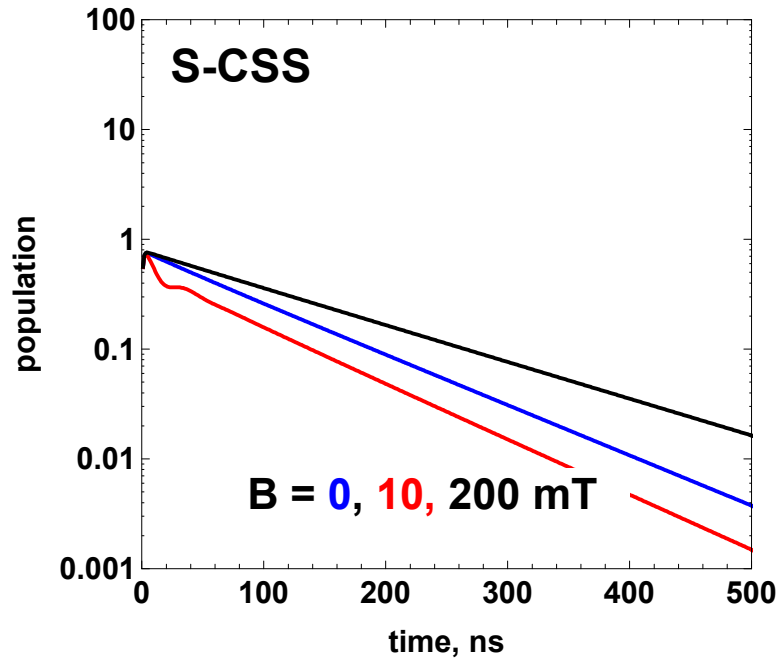

```
ListLogPlot[{RPvsB225[[1, 1]], RPvsB225[[1, 6]], RPvsB225[[1, 16]]},
  PlotStyle -> {{Thick, Blue}, {Thick, Red}, {Thick, Black}},
  PlotRange -> {{0.0, 500}, {0.001, 100}}, Joined -> True,
  BaseStyle -> {FontFamily -> "Arial", FontWeight -> "Bold", FontSize -> 16},
  AspectRatio -> 0.9, ImageSize -> 400, Frame -> True,
  FrameLabel -> {"time, ns", "population"}]
```

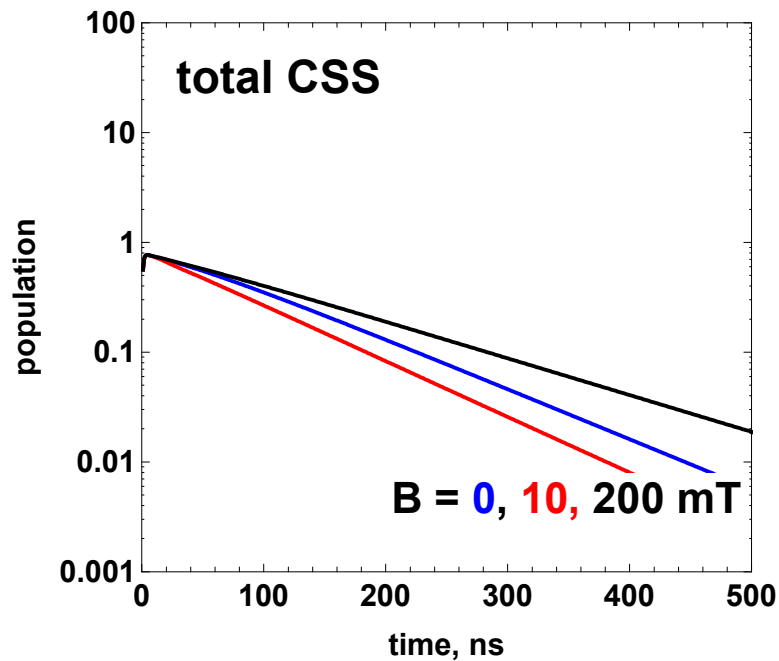

**kslowMq**

```
{{{0, 1.0565 × 107}, {2, 1.06843 × 107}, {5, 1.11238 × 107}, {7, 1.15653 × 107},
  {9, 1.16631 × 107}, {10, 1.16251 × 107}, {11, 1.15791 × 107}, {12, 1.15032 × 107},
  {13, 1.13016 × 107}, {15, 1.05916 × 107}, {17, 9.96143 × 106}, {20, 9.30117 × 106},
  {25, 8.63384 × 106}, {30, 8.25649 × 106}, {40, 7.88579 × 106}, {50, 7.72113 × 106},
  {60, 7.63469 × 106}, {80, 7.55131 × 106}, {100, 7.51369 × 106}, {200, 7.46457 × 106}}}
```

**SETS1 // TableForm**

| kCS | krCS  | kf   | ks    | kt   | k <sub>STD</sub> | Tlong | τ   | 2J,G | ΔA,G | a,G |
|-----|-------|------|-------|------|------------------|-------|-----|------|------|-----|
| 1.  | 0.025 | 0.25 | 0.001 | 0.02 | 0.1              | ∞     | 0.6 | 10.  | 15   | 10. |

**k1CSS**

```
{{{0, 1.05647 × 107}, {2, 1.0684 × 107}, {5, 1.11233 × 107}, {7, 1.15645 × 107},
  {9, 1.16623 × 107}, {10, 1.16244 × 107}, {11, 1.15783 × 107}, {12, 1.15024 × 107},
  {13, 1.13009 × 107}, {15, 1.05913 × 107}, {17, 9.96118 × 106}, {20, 9.30097 × 106},
  {25, 8.63368 × 106}, {30, 8.25635 × 106}, {40, 7.88566 × 106}, {50, 7.721 × 106},
  {60, 7.63456 × 106}, {80, 7.55118 × 106}, {100, 7.51356 × 106}, {200, 7.46443 × 106}}}
```

**kCSS**

```
{{{0, 1.04243 × 107}, {2, 1.05383 × 107}, {5, 1.09804 × 107}, {7, 1.14919 × 107},
  {9, 1.1724 × 107}, {10, 1.16817 × 107}, {11, 1.16346 × 107}, {12, 1.15266 × 107},
  {13, 1.12502 × 107}, {15, 1.04755 × 107}, {17, 9.85549 × 106}, {20, 9.21646 × 106},
  {25, 8.57113 × 106}, {30, 8.2066 × 106}, {40, 7.84896 × 106}, {50, 7.69023 × 106},
  {60, 7.60692 × 106}, {80, 7.52656 × 106}, {100, 7.49031 × 106}, {200, 7.44296 × 106}}}
```

```

ListLinePlot[{kCSSscl[[1]], kslowMq[[1]]},
  PlotRange → {{-0.5, 61}, {2 * 10^6, 2 * 10^7}},
  BaseStyle → {FontFamily → "Arial", FontSize → 16, FontWeight → Bold},
  GridLines → Automatic, PlotStyle → {{Thick, Red}, {Thick, Blue},
    {Thickness[0.01], Red, Dashed}, {Thickness[0.01], Blue, Dashed}},
  AspectRatio → 0.8, Axes → False, Frame → True,
  FrameLabel → {{Style["kslow/s-1", 20], None}, {"magnetic field/mT", None}},
  FrameTicks → {{Automatic, Automatic}, {Automatic, None}}, ImageSize → 500,
  Epilog → {PointSize[0.02], Cyan, Point[kslowMq[[1, 1 ;; 6]]], Blue,
    Point[kslowMq[[1, 7 ;; 16]]], Black, Point[klCSS[[1]], Red, Point[kCSS[[1]]]}]

```

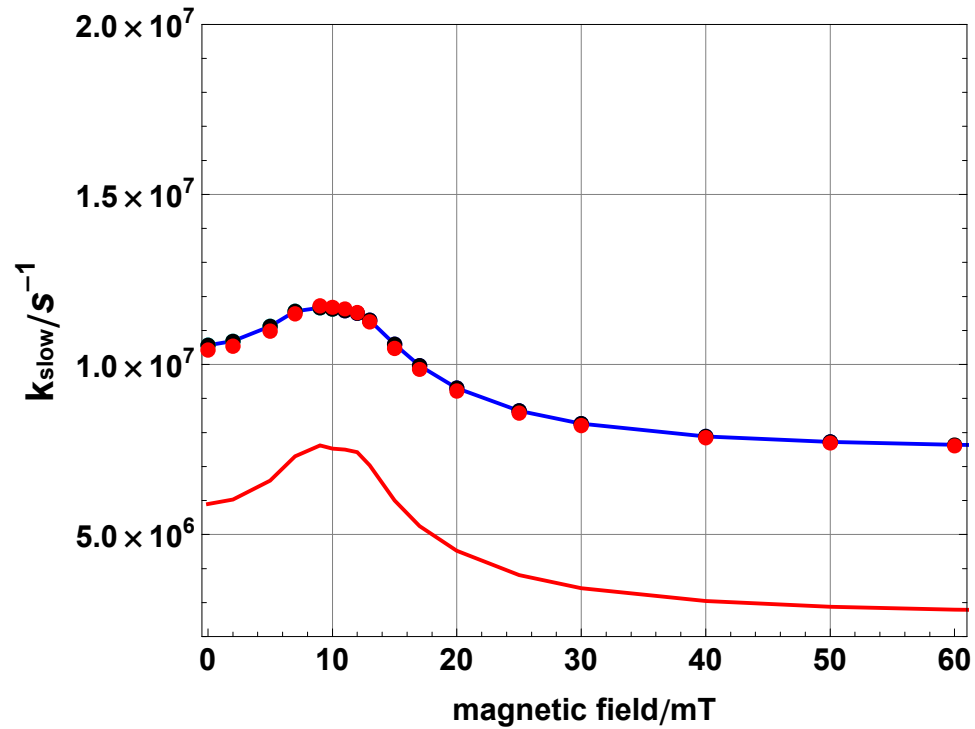

Supplement: d6cp00916f3.pdf [file d6cp00916f3.pdf]
